# Supplementary material for: Prostatic surgery with preservation of the supramonticular tissue versus standard surgery in benign prostatic hyperplasia: a systematic review
Source: Research Square preprint supplement (doi:10.21203/rs.3.rs-5728067/v1), 2025-01-02
Supplement: Supplementary file 1 [file a0eafeaf2a0bd12fc403d5b6.docx]

| **FORMULA** |  |
| --- | --- |
| ("Urinary Bladder Neck Obstruction" OR "Transurethral Resection of Prostate" OR “Bladder Outlet Obstruction” OR “Bladder Neck Obstruction” OR “Prostate Transurethral Resection*” OR “TURP*” OR “Transurethral Prostatectom*” OR “Transurethral Microwave Thermotherapy*” OR “Transurethral Thermotherapy*” OR “Contact Laser Ablation of Prostate” OR “Transurethral Electrovaporization of Prostate” OR “Prostate Transurethral Vaporesection*” OR “Prostate Transurethral Electroresection*” OR “benign prostatic hyperplasia*” OR “enucleation of the prostate*”)  (“ejaculation preserv*” OR “retrograde ejaculation*” OR “antegrade ejaculation preserv*” OR “bladder neck preserv*” OR “supramontan*” OR “transurethral incisión modified*” OR “ejaculation-sparing technique*” OR “ejaculation sparing*”) | Search strategy |
| (("Urinary Bladder Neck Obstruction"[Mesh] OR "Transurethral Resection of Prostate"[Mesh] OR “Bladder Outlet Obstruction”[tw] OR “Bladder Neck Obstruction”[tw] OR “Prostate Transurethral Resection*”[tw] OR “TURP*”[tw] OR “Transurethral Prostatectom*”[tw] OR “Transurethral Microwave Thermotherapy*”[tw] OR “Transurethral Thermotherapy*”[tw] OR “Contact Laser Ablation of Prostate”[tw] OR “Transurethral Electrovaporization of Prostate”[tw] OR “Prostate Transurethral Vaporesection*”[tw] OR “Prostate Transurethral Electroresection*”[tw] OR “benign prostatic hyperplasia*”[tw] OR “enucleation of the prostate*”[tw]) AND (“ejaculation preserv*”[tw] OR “retrograde ejaculation*”[tw] OR “antegrade ejaculation preserv*”[tw] OR “bladder neck preserv*”[tw] OR “supramontan*”[tw] OR “transurethral incisión modified*”[tw] OR “ejaculation-sparing technique*”[tw] OR “ejaculation sparing*”[tw])) | Search strategy for PUBMED"  326 |
| TS=("Urinary Bladder Neck Obstruction" OR "Transurethral Resection of Prostate" OR “Bladder Outlet Obstruction” OR “Bladder Neck Obstruction” OR “Prostate Transurethral Resection*” OR “TURP*” OR “Transurethral Prostatectom*” OR “Transurethral Microwave Thermotherapy*” OR “Transurethral Thermotherapy*” OR “Contact Laser Ablation of Prostate” OR “Transurethral Electrovaporization of Prostate” OR “Prostate Transurethral Vaporesection*” OR “Prostate Transurethral Electroresection*” OR “benign prostatic hyperplasia*” OR “enucleation of the prostate*”)  TS=(“ejaculation preserv*” OR “retrograde ejaculation*” OR “antegrade ejaculation preserv*” OR “bladder neck preserv*” OR “supramontan*” OR “transurethral incisión modified*” OR “ejaculation-sparing technique*” OR “ejaculation sparing*”) | Search strategy for Web of Science  294 |
| ("Urinary Bladder Neck Obstruction" OR "Transurethral Resection of Prostate" OR “Bladder Outlet Obstruction” OR “Bladder Neck Obstruction” OR “Prostate Transurethral Resection” OR “TURP” OR “Transurethral Prostatectom” OR “Transurethral Microwave Thermotherapy” OR “Transurethral Thermotherapy” OR “Contact Laser Ablation of Prostate” OR “Transurethral Electrovaporization of Prostate” OR “Prostate Transurethral Vaporesection” OR “Prostate Transurethral Electroresection” OR “benign prostatic hyperplasia” OR “enucleation of the prostate”) AND (“ejaculation preserv” OR “retrograde ejaculation” OR “antegrade ejaculation preserv” OR “bladder neck preserv” OR “supramontan” OR “transurethral incisión modified” OR “ejaculation-sparing technique” OR “ejaculation sparing”) | Search strategy for Cochrane  126 |
| TITLE-ABS-KEY ( ( "Urinary Bladder Neck Obstruction" OR "Transurethral Resection of Prostate" OR "Bladder Outlet Obstruction" OR "Bladder Neck Obstruction" OR "Prostate Transurethral Resection*" OR "TURP*" OR "Transurethral Prostatectom*" OR "Transurethral Microwave Thermotherapy*" OR "Transurethral Thermotherapy*" OR "Contact Laser Ablation of Prostate" OR "Transurethral Electrovaporization of Prostate" OR "Prostate Transurethral Vaporesection*" OR "Prostate Transurethral Electroresection*" OR "benign prostatic hyperplasia*" OR "enucleation of the prostate*" ) AND ( "ejaculation preserv*" OR "retrograde ejaculation*" OR "antegrade ejaculation preserv*" OR "bladder neck preserv*" OR "supramontan*" OR "transurethral incisión modified*" OR "ejaculation-sparing technique*" OR "ejaculation sparing*" ) ) | Search strategy for SCOPUS  656 |
