# Supplementary material for: Prostatic surgery with preservation of the supramonticular tissue versus standard surgery in benign prostatic hyperplasia: a systematic review
Source: Research Square preprint supplement (doi:10.21203/rs.3.rs-5728067/v1), 2025-01-02
Supplement: Supplementary file 2 [file b5e3779c94c0665ee046f886.docx]

| **N** | **Author and year** | **Name of the Study** | **Reason for exclusion** |
| --- | --- | --- | --- |
| 1 | Ronzoni (1998) | Evaluating outcomes of combined bladder neck and supramontanal sparing ejaculatory preserving transurethral resection of the prostate: Results from a prospective, randomised study. | Included study |
| 2 | Abdel-Basir 2003) | Bladder Neck Resection with Preservation of Antegrade Ejaculation: Basir Technique | Included study |
| 3 | Tatawy (2013) | Ejaculation preserving transuretheral resection of the prostate (turp): randomized comparative study to evaluate different techniques. | Incomplete data in the results |
| 4 | Kim (2014) | Pilot study of the clinical efficacy of ejaculatory hood sparing technique for ejaculation preservation in Holmium laser enucleation of the prostate | Included study |
| 5 | Cacciamani (2019) | Anterograde ejaculation preservation after endoscopic treatments in patients with bladder outlet obstruction: systematic review and  pooled-analysis of randomized clinical trials. | The supramontanal tissue (1 cm above the verum montanum) is not preserved |
| 6 | Abolazm (2020) | Ejaculatory Hood Sparing versus Standard Laser Photoselective Vaporization of the Prostate: Sexual and Urodynamic Assessment through a Double Blinded, Randomized Trial | Included study |
| 7 | Elshazly (2021) | Evaluation of a novel technique of bladder neck and supramontanal sparing ejaculatory preserving transurethral prostatectomy | Included study |
| 8 | Destefanis (2021) | Ejaculation-sparing versus non-ejaculation-sparing anatomic GreenLight laser enucleo-vaporization of the prostate: first comparative study. | Retrospective study |
| 9 | Huang (2021) | The effect of transurethral plasma enucleation of prostate with bladder neck and prostatic apex urethral mucosa preservation on the ejaculation function in the treatment of benign prostatic hyperplasia | Full text not found |
| 10 | Manasa (2022) | Evaluating outcomes of combined bladder neck and supramontanal sparing ejaculatory preserving transurethral resection of the prostate: Results from a prospective, randomised study. | Included study |
| 11 | Guldibi (2023) | What is the effect of laser anatomical endoscopic enucleation of the prostate on the ejaculatory functions? A systematic review | Systematic review without meta-analysis |
